RESEARCH ARTICLE

# Experimental blunt chest trauma-induced myocardial inflammation and alteration of gap-junction protein connexin 43

Miriam Kalbitz<sup>1\*</sup>, Elisa Maria Amann<sup>2</sup>, Belinda Bosch<sup>1</sup>, Annette Palmer<sup>3</sup>, Anke Schultze<sup>3</sup>, Jochen Pressmar<sup>1</sup>, Birte Weber<sup>1</sup>, Martin Wepler<sup>4</sup>, Florian Gebhard<sup>1</sup>, Hubert Schrezenmeier<sup>2</sup>, Rolf Brenner<sup>5</sup>, Markus Huber-Lang<sup>3</sup>

**1** Department of Traumatology, Hand-, Plastic-, and Reconstructive Surgery, Center of Surgery, University of Ulm, Ulm, Germany, **2** Institute of Clinical Transfusion Medicine and Immunogenetics Ulm, German Red Cross Blood Transfusion Service Baden-Württemberg–Hessen and University Hospital Ulm, University of Ulm, Ulm, Germany, **3** Institute of Clinical and Experimental Trauma-Immunology, University of Ulm, Ulm, Germany, **4** Institute of Anaesthesiological Pathophysiology and Process Engineering, University of Ulm, Ulm, Germany, **5** Division of Biochemistry of Joint and Connective Tissue Diseases, Department of Orthopedics, University of Ulm, Ulm, Germany

☯ These authors contributed equally to this work.

\* [miriam.kalbitz@uniklinik-ulm.de](mailto:miriam.kalbitz@uniklinik-ulm.de)

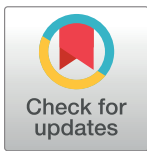

**OPEN ACCESS**

**Citation:** Kalbitz M, Amann EM, Bosch B, Palmer A, Schultze A, Pressmar J, et al. (2017) Experimental blunt chest trauma-induced myocardial inflammation and alteration of gap-junction protein connexin 43. *PLoS ONE* 12(11): e0187270. <https://doi.org/10.1371/journal.pone.0187270>

**Editor:** Meijing Wang, Indiana University School of Medicine, UNITED STATES

**Received:** June 8, 2017

**Accepted:** October 17, 2017

**Published:** November 9, 2017

**Copyright:** © 2017 Kalbitz et al. This is an open access article distributed under the terms of the [Creative Commons Attribution License](https://creativecommons.org/licenses/by/4.0/), which permits unrestricted use, distribution, and reproduction in any medium, provided the original author and source are credited.

**Data Availability Statement:** All relevant data are within the paper.

**Funding:** The authors declare no commercial or financial conflicts of interest related to the studies. This work is supported by Deutsche Forschungsgemeinschaft grant CRC 1149 and SFB1149 to FG and MH-L. The funders had no role in study design, data collection and analysis, decision to publish, or preparation of the manuscript.

## Abstract

### Objective

Severe blunt chest trauma in humans is associated with high mortality rates. Whereas lung tissue damage and lung inflammation after blunt chest trauma have extensively been investigated, the traumatic and posttraumatic effects on the heart remain poorly understood. Therefore, the purpose of this study was to define cardiac injury patterns in an experimental blunt chest trauma model in rats.

### Methods

Experimental blunt chest trauma was induced by a blast wave in rats, with subsequent analysis of its effects on the heart. The animals were subjected either to a sham or trauma procedure. Systemic markers for cardiac injury were determined after 24 h and 5 days. Post-mortem analysis of heart tissue addressed structural injury and inflammation 24 h and 5 days after trauma.

### Results

Plasma levels of extracellular histones were elevated 24 h and 5 days after blunt chest trauma compared to sham-treated animals. In the heart, up-regulation of interleukin-1 $\beta$  24 h after trauma and increased myeloperoxidase activity 24 h and 5 days after trauma were accompanied by reduced complement C5a receptor-1 expression 24 h after trauma. Histological analysis revealed extravasation of erythrocytes and immunohistochemical analysis alteration of the pattern of the gap-junction protein connexin 43. Furthermore, a slight reduction of  $\alpha$ -actinin and desmin expression in cardiac tissue was found after trauma together

**Competing interests:** The authors have declared that no competing interests exist.

**Abbreviations:** ACTN2, actinin alpha 2; ATP2A2, ATPase, Ca<sup>2+</sup> transporting, cardiac muscle, slow twitch 2; BCA, bicinchoninic acid; C5a, complement component 5a; C3a, complement component 3a; C5aR, complement component 5a receptor; Cx43, connexin 43; DES, desmin; ELISA, enzyme-linked immunosorbent assay; H.E, hematoxylin and eosin; H-FABP, heart-type fatty acid-binding protein; HPRT 1, hypoxanthine phosphoribosyltransferase 1; HRP, horseradish peroxidase; IL-1 $\beta$ , interleukin-1 $\beta$ ; IL-6, interleukin-6; MPO, myeloperoxidase; qRT-PCR, real-time quantitative polymerase chain reaction; RIPA, radio-immuno-precipitation assay; SEM, standard error of the mean; SERCA, sarcoplasmic/endoplasmic reticulum calcium-ATPase; SOFA, Sequential Organ Failure Assessment; TBS, tris-buffered saline; TUNEL, TdT-mediated dUTP-biotin nick end labeling.

with a minor increase in sarcoplasmic/endoplasmic reticulum calcium-ATPase (SERCA) expression.

## Conclusions

The clinically highly relevant rat model of blast wave-induced blunt chest trauma is associated with cardiac inflammation and structural alterations in cardiac tissue.

## Introduction

In the United States, approximately 30,000 patients with blunt cardiac trauma were recorded annually [1]. Heart injury represents an independent predictor for a poor outcome [2], prolonged ventilation interval [3] and longer hospital stay [4], and is associated with dysrhythmias (including ventricular fibrillation) and sudden cardiac arrest [5, 6]. Accordingly, myocardial contusion strongly correlates with the incidence of perioperative hemodynamic instability [7]. In the experimental setting of blast injury, bradycardia [8, 9] and decreased mean arterial pressure [10] [8, 11] have been reported. Some studies have postulated a reflexive nature of the blast wave-induced bradycardia, which could be prevented by vagotomy [11] or traumatic stimulation of arterial baroreceptors [12]. In addition, effects of blunt cardiac injury appear to enhance the firmness of cardiac tissue, as demonstrated in a pig model of blunt chest trauma [13].

In general, following tissue damage, endogenous alarmins are released, which may interact with cellular receptors to induce a proinflammatory immune response [14, 15]. In this context, circulating nucleosomes have been reported to correlate with the injury severity score in humans. Furthermore, they may dissociate to individual histones [16], which in turn interact with a variety of cells, including cardiomyocytes [17–19]. During systemic inflammation, the occurrence of histones has been linked to organ failure and mortality [16, 19–21]. Following major trauma in humans, a series of plasma biomarkers, including interleukin (IL)-6 [22] and the anaphylatoxins C3a and C5a [23], are elevated. Interaction of C5a with the C5a receptor 1 (C5aR1) can induce dramatic contractile dysfunction in cardiomyocytes *in vitro* [24] and *in vivo* during sepsis.

However, the mechanistic basis of depressed cardiac function after trauma remains elusive. Therefore, in the present study, a blast wave-induced blunt chest trauma model was applied to investigate cardiac injury.

## Materials and methods

### Animals

All experimental and animal procedures followed the guide of care and use of laboratory animals published by the US National Institutes of Health. The study was approved by the regional animal care and use committee (Regierungspräsidium Tübingen) and performed according to guidelines (Permit No. 1182). Adult, male Wistar rats (7–8 weeks, 310  $\pm$  50 g) were obtained from Charles River (Sulzfeld, Germany). All animals had free access to water and food before and after chest trauma.

### Animal preparation

Rats were anesthetized using a 2.5% sevoflurane (Abott, Wiesbaden, Germany) and 97.5% oxygen mixture under continuous flow of 1 l/min. Buprenorphine (Essex, Pharma, Munich,

Germany) was administered subcutaneously (0.03 mg/kg body weight) immediately after trauma or sham procedure and 8 h thereafter.

## Blunt chest trauma

Bilateral lung contusion was induced by a single blast injury in anesthetized rats as described previously [10, 25, 26]. In brief, opening of a high-speed valve (Hee-D-24, Festo, Esslingen, Germany) delivered compressed air into the upper section of a cylinder. The upper compartment was separated from the lower compartment by a Mylar® polyester film (Du Pont de Nemur, Bad Homburg, Germany). The polyester membrane ruptured at a standardized pressure, thus releasing a defined blast wave in the lower section of the cylinder, centered on the ventral thorax of the animal. The level of the blast impact to induce pulmonary contusion was chosen based on histologic, cardiopulmonary and immunologic changes in earlier studies, but without lethal outcome. Sham procedure included anesthesia and analgesia without blunt chest trauma. After trauma or sham procedure the animals were monitored every 8 h regarding bodyweight, breathing, vigilance and mobility as well as general state of health. Buprenorphine (Essex) was administered subcutaneously (0.03 mg/kg body weight) immediately after trauma or sham procedure and 8 h thereafter. At the end of the observation period the animals were anesthetized using a 2.5% sevoflurane (Abott, Wiesbaden, Germany) and 97.5% oxygen mixture under continuous flow of 1 l/min and exsanguinated.

## Sample collection

Full-blood samples were collected 24 h and 5 d after trauma (S-Monovette EDTA, SARSTEDT AG, Nümbrecht, Germany) and kept at 4°C for 40 min. After centrifugation (800xg for 5 min at 4°C followed by 13,000xg for 2 min at 4°C), plasma was removed and stored at -80°C until analysis. Heart tissue of the left ventricles was obtained either at 24 h or 5 d after blunt chest trauma and fixed using 3.7% formalin followed by embedding in paraffin until analysis.

## Histone enzyme-linked immunosorbent assay (ELISA)

Histones in rat plasma were determined using a cell-death detection ELISA kit, which detects all histones (Hoffmann-La Roche, Indianapolis, IN). A histone mixture (containing H2, H2A, H2B, H3, H4) was used to establish a standard curve, as described previously [21].

## Western blotting

Left ventricular tissue was obtained 24 h or 5 d after multiple trauma or sham procedure and homogenized and lysed using RIPA Lysis Buffer (EMD Millipore, Darmstadt, Germany) containing complete Mini-protease inhibitor and PhosSTOP protease inhibitor cocktail (Roche). Protein concentrations were determined in homogenates using the Pierce® BCA Protein Assay Kit (Thermo Fischer Scientific, Waltham, MA, USA). Samples were loaded under reducing conditions onto a Mini-Protean® TGX™ Precast Gel (Bio-Rad Laboratories, Munich, Germany). After electrophoresis, the proteins were transferred by a Trans-Blot Turbo Transfer System using Mini Transfer Packs (Bio-Rad). The blots were blocked with 5% milk (C5aR1) or 5% bovine serum albumin (connexin 43 (Cx43)) in tris-buffered saline for 1 h at room temperature (RT) and incubated with antibodies (see below) overnight at 4°C. For analysis of the rat heart homogenates, rabbit anti-C5aR1 (Proteintech, Manchester, UK) and for Cx43 rabbit anti-connexin (Cell Signaling Technology, Danvers, MA) were used. HRP-conjugated anti-rabbit immunoglobulin G (IgG) (Cell Signaling) was used as a secondary antibody. Chemiluminescent HRP Hy Glo™ (Denville Scientific Inc, South Plainfield, NJ) was used. The blots

were analyzed by ChemiDoc (BioRad Laboratories GmbH, Munich, Germany) and Image Lab Software (Version 5.2, BioRad).

### Detection of mRNA for IL-1 $\beta$ , DES, ACTN2 and ATP2A2 in rat-heart homogenates by real-time quantitative PCR (qRT-PCR) analysis

Rat left ventricles were obtained 24 h or 5 d after thorax trauma or sham procedure. Total RNA was isolated from rat heart homogenates by the TRIZOL<sup>®</sup> method (Thermo Fischer Scientific) according to manufacturer's instructions. cDNA was generated and amplified (SYBR<sup>®</sup>) using reagents from Life Technologies. Amplification was performed using Strata-gene Mx 300P (Thermo Fischer Scientific, Waltham, MA, USA). Calculation of the relative quantitative results was performed with the 2<sup>- $\Delta\Delta$ Ct</sup> algorithm. The following primers were used:

IL-1 $\beta$  5' GCCCTTGACTTGGGCTGTCC3' (forward),  
 IL-1 $\beta$  5' GAAGCTCCACGGGCAAGACA3' (reverse);  
 desmin (DES) 5' TGTTCACGAGCAGGCTTC3' (forward),  
 DES 5' CCTGGTACACGCGGGATGTC3' (reverse);  
 actinin alpha 2 (ACTN2) 5' AGCGGCAGTCCATCCTAGCC3' (forward),  
 ACTN2 5' GCAGCTCGTCCATGGTGACA3' (reverse);  
 ATPase, Ca<sup>2+</sup> transporting, cardiac muscle, slow twitch 2 (ATP2A2)  
 5' CTGACCCTGTCCCTGACCA3' (forward),  
 ATP2A2 5' CGCCACCACCCTCCCATAG3' (reverse);  
 C5aR1 5' -TTGTGCGTTTCCCTGGCCTA-3' (forward),  
 C5aR1 5' -GCTGTCCCTGCCCAAGGAGT-3' (reverse).  
 Housekeeping gene hypoxanthine phosphoribosyltransferase 1 (HPRT 1)  
 5' AGGACCTCTCGAAGTGTGG3' (forward),  
 HPRT 1 5' TTTCCACTTTCGCTGATGAC3' (reverse).

### Histology by hematoxylin and eosin and immunohistochemistry

To determine extravasal bleeding in cardiac muscle, 4- $\mu$ m paraffin sections were stained with Gill's hematoxylin and eosin (H.E, Morphisto Evaluationsforschung & Anwendung GmbH, Frankfurt am Main, Germany). The formalin-fixed left ventricles were immunohistochemically analyzed. A heat-induced antigen retrieval was performed by boiling the sections twice in sodium citric buffer (pH 6). C5aR1 was detected using a polyclonal rabbit anti-C5aR1 antibody (MyBioSource, San Diego, CA, USA). Caspase 3 staining was performed by rabbit anti-cleaved caspase 3 (Cell Signaling, Danvers, MA, USA). After incubation with the primary antibody, detection by DAKO Real Detection System alkaline phosphatase red (Dako, Glostrup, Denmark) was performed. The sections were counterstained with Mayer's hematoxylin (Sigma, Darmstadt, Germany). Control staining was performed using a nonspecific rabbit IgG (Dako). For Cx43 localization in left ventricular cardiomyocytes, rabbit anti-Cx43 (Cell Signaling Technology) was used.

Apoptosis staining was conducted using the CF488A TUNEL apoptosis detection kit (Biotium, Fremont, USA) according to the manufacturer's protocol. Following staining, cells were washed twice with PBS and covered with ProLong<sup>®</sup> Gold Antifade Mountant with 4',6-Diamidin-2-phenylindol (DAPI) (Thermo Scientific). For imaging, an Axio Imager M.1 Microscope (Carl Zeiss AG, Oberkochen, Germany) was used. Pixel density was determined using Image J [27].



## Heart myeloperoxidase (MPO)

Heart MPO activity was quantified as described previously [28]. In brief, left ventricular tissue was homogenized (Ultraturrax T25, Jahnke und Kunkel, Staufen, Germany) in 1.5 ml buffer containing 10.35 g  $\text{KH}_2\text{PO}_4$  (Merckmillipore, Darmstadt, Germany) in 950 ml distilled water adjusted to pH 5.4 using 0.91 g  $\text{K}_2\text{HPO}_4$  (Merckmillipore) in 50 ml distilled water and 0.5% hexadecyltrimethylammonium bromide (Sigma). Tissue homogenates were incubated at 60°C for 2 h followed by centrifugation at 3,950x g at RT for 15 min. A total of 25  $\mu\text{l}$  tissue or standard solution (Novabiochem, Schwalbach, Germany) was mixed with 25  $\mu\text{l}$  tetramethylbenzidine (Sigma) and 200  $\mu\text{l}$  0.002%  $\text{H}_2\text{O}_2$  (Fluka, Deisenhofen, Germany) and incubated at 37°C for 5 min. Extinction values were read at 450 nm and MPO activity was calculated on the basis of standard curves. Thereafter, perchloric-acid precipitation was performed and the protein concentration was determined using the Pierce® BCA Protein Assay Kit (Thermo Scientific) as recommended by the manufacturer.

## Statistical analysis

All values were expressed as means  $\pm$  standard error of the mean. Data were analyzed by one-way analysis of variance followed by Dunnett's multiple comparison test. A value of  $p \leq 0.05$  was considered statistically significant. GraphPad Prism 7.0 software was used for statistical analysis (GraphPad Software, Incorporated, San Diego, Ca, USA).

## Results

### Appearance of extracellular histones in plasma and extravasation of erythrocytes in cardiac tissue after blunt chest trauma (Fig 1)

Because there is evidence that extracellular histones are elevated in human plasma after trauma [16] and because cardiac dysfunction has been linked to the appearance of extracellular histones during sepsis [29], plasma levels of extracellular histones were determined. The plasma extracellular-histone concentration was elevated 24 h and 5 d after trauma compared to sham-treated animals.

With the objective to assess cardiac injury after blunt chest trauma in rats, H.E. staining of left ventricle tissue was performed, revealing no extravasation of erythrocytes in sham-treated animals (0/4). In 2/4 and 3/4 rats at 24 h and 5 d after blunt chest trauma, respectively, extravasation of erythrocytes was present in histological sections (frame B).

### Local inflammation in the left ventricular tissue after trauma (Fig 2)

To assess inflammation, left ventricle tissue homogenates were obtained either 24 h or 5 d after blunt chest trauma or sham procedure. MPO activity, indicating the recruitment and activation of neutrophils, was significantly increased in cardiac tissue 24 h and 5 d after blunt chest trauma (frame A). The expression of the proinflammatory cytokine IL-1 $\beta$  in left ventricles, as assessed by qRT-PCR, was significantly increased 24 h after blunt chest trauma compared to the sham procedure (frame B). C5aR1 protein assessed by western blot was diminished in left ventricles 24 h after blunt chest trauma compared to the sham procedure (frame C). C5aR mRNA expression was not different in sham treated animals compared to blunt chest trauma procedure (frame D).

### Translocation of Cx43 after blunt chest trauma (Fig 3)

To determine whether gap-junction proteins in the heart were altered after blunt chest trauma, immunohistochemical staining of Cx43 gap-junction protein in left ventricular tissue sections was

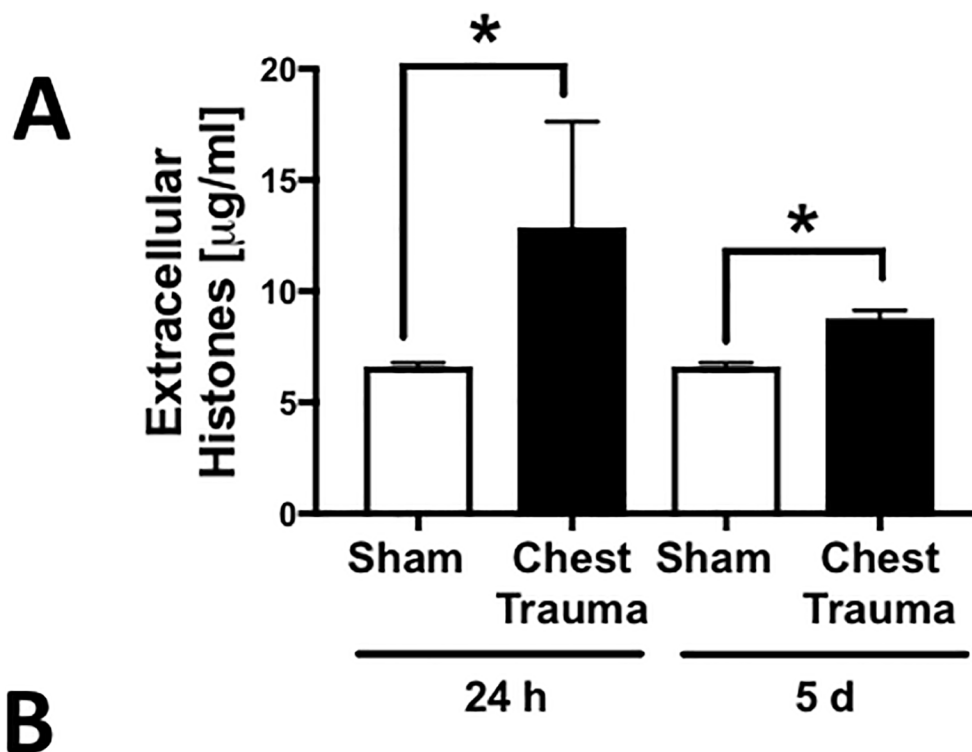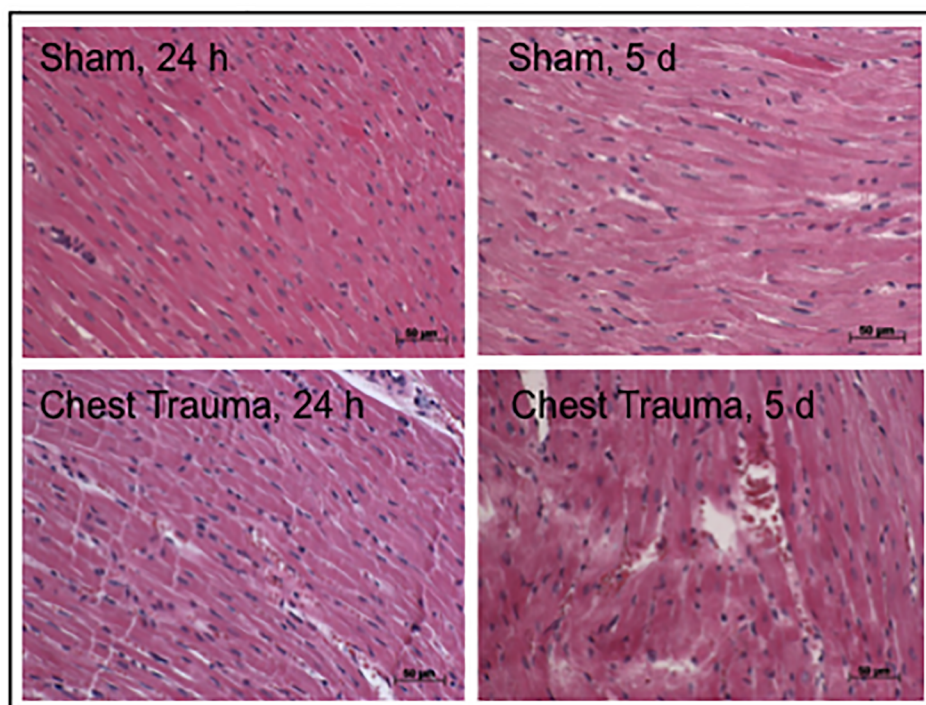

**Fig 1. Systemic and local effects of blunt chest trauma.** Appearance of extracellular histones in plasma 24 h and 5 d after blunt chest trauma or sham, \* differences to sham procedure were significant,  $p < 0.05$ ;  $n = 4$  for each bar. B. Representative H.E staining of left ventricles 24 h or 5 d after blunt chest trauma or sham procedure as indicated.

<https://doi.org/10.1371/journal.pone.0187270.g001>

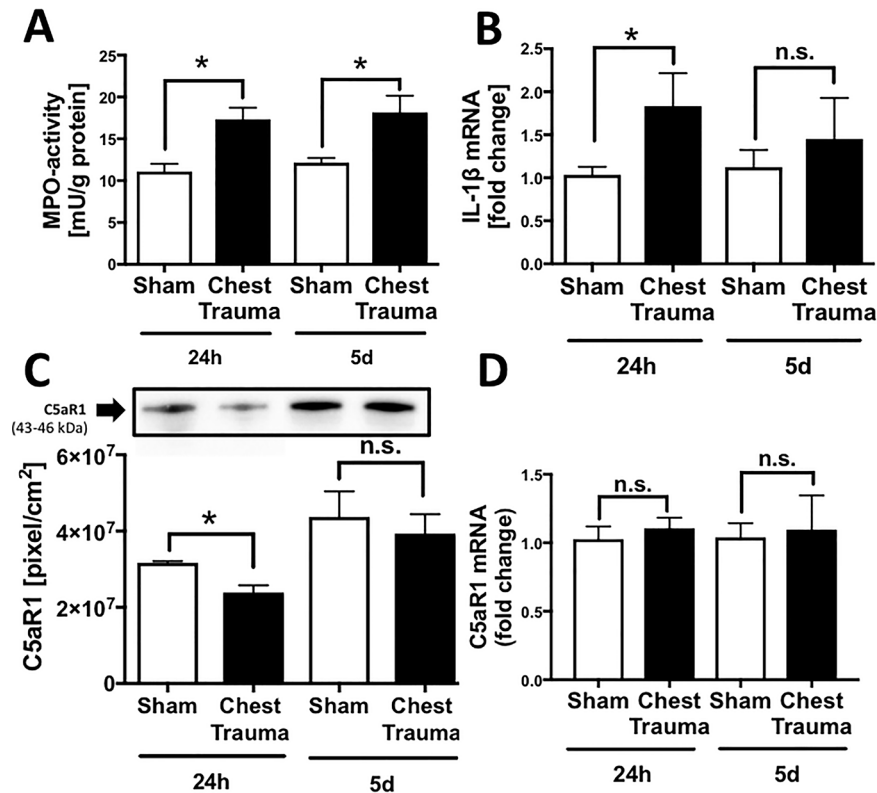

**Fig 2. Local inflammation in cardiac injury after blunt chest trauma.** A. Increased myeloperoxidase (MOP) activity in left ventricular cardiac tissue 24 h and 5 d after blunt chest trauma compared to sham procedure. B. Elevation of proinflammatory cardiodepressive cytokine IL-1 $\beta$  expression in left ventricular homogenates 24 h after blunt chest trauma compared to sham procedure as assessed by qRT-PCR. C. Representative western blot for C5aR1 of left ventricular tissue homogenates. Densitometry revealed diminished C5aR1 protein expression in left ventricular homogenates 24 h after blunt chest trauma compared to sham procedure. D. C5aR expression in left ventricular homogenates 24 h and 5 d after blunt chest trauma and after sham procedure as assessed by qRT-PCR.  $p < 0.05$ ; \*differences were significant to sham procedure, For all frames  $n = 8$  for each bar.

<https://doi.org/10.1371/journal.pone.0187270.g002>

performed. In sham-treated animals, Cx43 was located in intercalated discs, whereas 24 h and 5 d after blunt chest trauma, Cx43 was translocated and scattered into the cytosol (frame A). Western-blot analysis provided data showing slightly but not significantly increased Cx43 protein concentrations in left ventricular tissue homogenates 24 h after blunt chest trauma (frame B).

### Apoptosis in cardiac tissue after blunt chest trauma (Fig 4)

Increased apoptosis was observed after blunt chest trauma in the heart 5 d after trauma compared to sham procedure as assessed by immunohistochemical staining of cleaved caspase 3 (frame A). Densitometry provided data showing significantly increased cleaved caspase 3 staining 5 d after blunt chest trauma compared to sham procedure. Trauma induced cardiomyocyte apoptosis was further determined by TUNEL staining in left ventricular tissue. 24 h after trauma apoptosis was slightly increased after trauma compared to sham procedure whereas 5 d after blunt chest trauma apoptosis was significantly increased compared to sham procedure (frame C).

Expression of  $\alpha$ -actinin, desmin and SERCA in cardiac tissue after blunt chest trauma (S1 Fig)

**A**

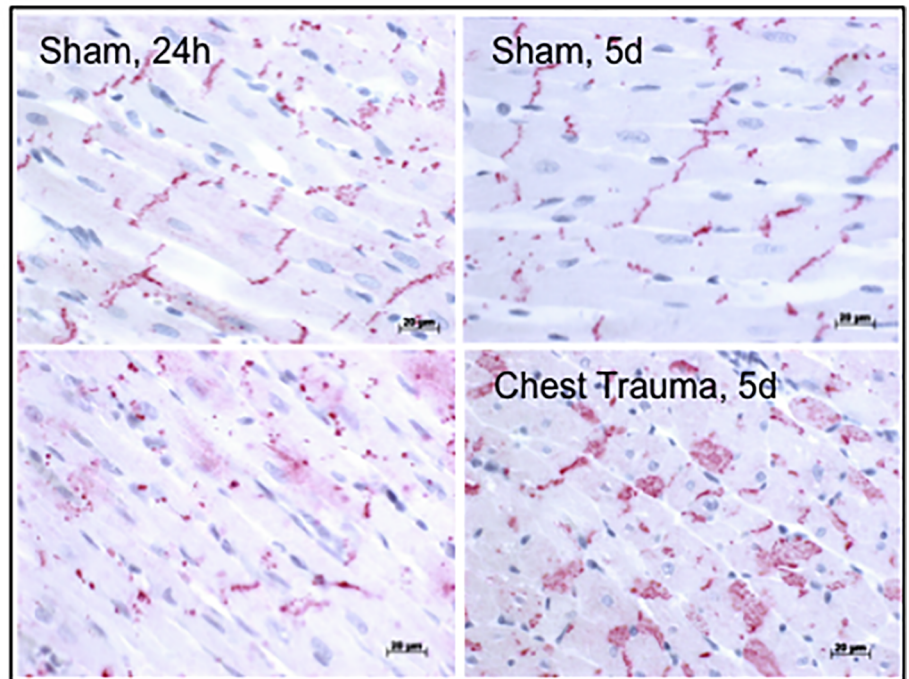

**B**

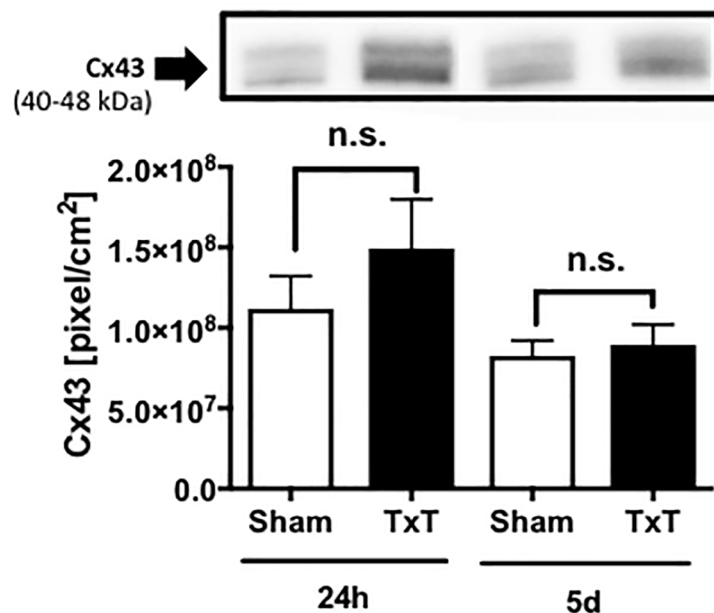

**Fig 3. Structural alterations in the heart after blunt chest trauma.** Alteration of gap junctional protein connexin 43 (Cx43) after blunt chest trauma in the heart. A. Representative distribution of Cx43 in cardiac tissue after sham procedure or 24 h or 5d after blunt chest trauma as indicated. B. Representative western blot for Cx43 of left ventricular tissue homogenates. Densitometry revealed no significant increase in protein expression in left ventricular homogenates 24 h and 5 d after blunt chest trauma compared to sham procedure. For all frames n = 4 for each bar.

<https://doi.org/10.1371/journal.pone.0187270.g003>

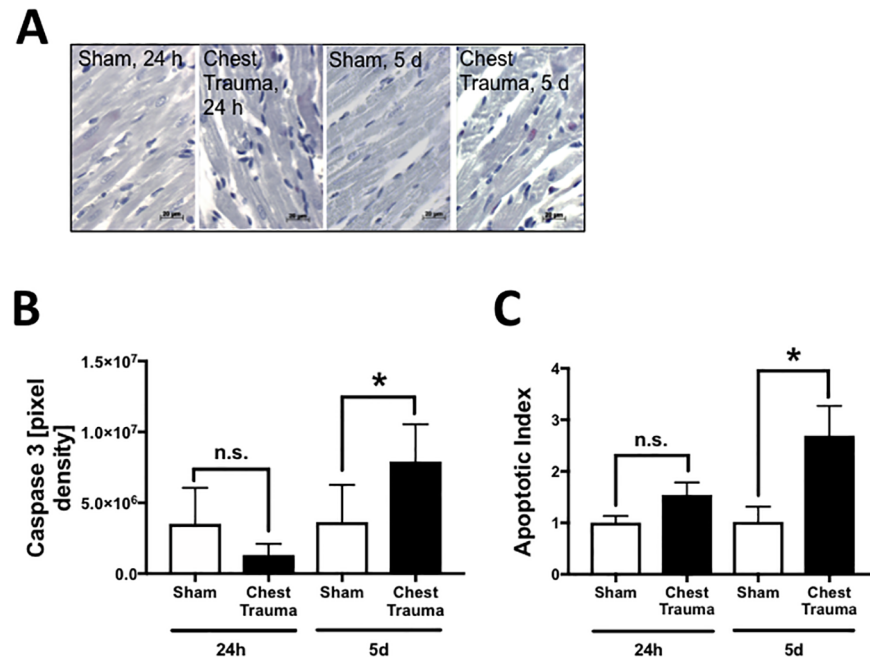

**Fig 4. Apoptosis in the heart after blunt chest trauma.** A. Representative caspase 3 staining in cardiac tissue after sham procedure or 24 h and 5d after blunt chest trauma as indicated. B. Changes in pixel density of caspase 3 staining in left ventricular tissue 24h or 5d after blunt chest trauma compared to sham procedure as assessed by immunohistochemistry. C. Trauma induced cardiomyocyte apoptosis was determined by TUNEL (TdT-mediated dUTP-biotin nick end labeling) staining in left ventricular tissue 24h and 5d after blunt chest trauma compared to sham procedure as assessed by fluorescence microscopy. The total number of nuclei in cardiomyocytes were determined by DAPI staining and apoptotic nuclei were determined by positive TUNEL staining. The apoptotic index was calculated (number of positively stained/total number of nuclei). For all frames n = 4 for each bar. \* p<0.05.

<https://doi.org/10.1371/journal.pone.0187270.g004>

Altered expression of z-disc proteins after blunt chest trauma was observed in the heart. Desmin expression was diminished 24 h and 5 d after blunt chest trauma compared to the sham procedure (frame A).  $\alpha$ 2-Actinin expression was likewise reduced 24 h after blunt chest trauma compared to the sham procedure (frame B). To assess alteration of calcium pumps in the heart, SERCA mRNA was determined by qRT-PCR. SERCA expression 24 h after blunt chest trauma was slightly increased (frame C).

## Discussion

We investigated the association between blast wave-induced blunt chest trauma and structural and molecular alterations in cardiac tissue. In animal studies of myocardial contusion, the increase of systemic markers specific for cardiac-cell damage, including cardiac troponins, depends on the power of the kinetic energy applied to the heart [30].

Extracellular histones released after trauma might be important protagonists of cardiac dysfunction. In the present study, we confirmed the appearance of histones in plasma 24 h and 5 d after trauma compared to sham-treated animals. This result is in agreement with earlier studies demonstrating the appearance of circulating histones after trauma in humans and mice [16, 31]. Furthermore, a significant correlation between circulating histone levels and Sequential Organ Failure Assessment (SOFA) [16] was observed in patients with traumatic lung injury. Extracellular histones were found to be major mediators of cardiac injury in patients with sepsis [32] and in experimental murine sepsis [29]. The presence of histones in plasma



was associated with their accumulation in the heart [33] *in vivo*, and on the plasma membrane and in the cytosol of cardiomyocytes *in vitro* [29]. In earlier studies, we observed a robust increase of intracellular calcium and reactive oxygen species in cardiomyocytes after exposure to extracellular histones [29], which has been linked to defective cardiomyocyte function [34, 35], [36]. Correspondingly, an enhanced extracellular-histone concentration after blunt chest trauma in rats might be linked to cardiac dysfunction.

Histological analysis of the left ventricle tissue after blunt chest trauma revealed evidence of acute tissue damage that occurs early after trauma, probably as a result of the direct mechanical force applied during blunt chest trauma. However, further studies with earlier time points or serial measurements of systemic markers indicating cardiac-cell damage, including heart-type fatty acid-binding protein (H-FABP) are needed to learn more about the dynamics of H-FABP after blunt chest trauma. Apoptosis staining revealed increased apoptosis in cardiac tissue 5 days after trauma.

In the current study, IL-1 $\beta$  expression in left ventricular homogenates was increased 24 h after blunt chest trauma. Recent studies demonstrated that IL-1 $\beta$  release by cardiomyocytes was complement dependent [37, 38]. Therefore, complement activation with the generation of C5a might support cardiac dysfunction after blunt chest trauma by inducing cardio-depressive cytokines. Of note, in the present study, C5aR1 protein was reduced in left ventricular tissue homogenates of rats 24 h after trauma. This is in contrast to earlier studies in rats, which showed increased C5aR1 expression in the heart 24 h after burn injury [39] and on cardiomyocytes obtained from models of experimental sepsis [24]. One possible explanation for the observed post-trauma C5aR1 downregulation could be a trauma-induced, C5a-triggered internalization of the C5aR1 after trauma [40], which is underlined by the lack of downregulation of the C5aR1 on mRNA level. In sepsis, excessive complement activation and C5a generation in animal models and in humans with sepsis was associated with reduced C5aR1 expression [41, 42]. In isolated perfused hearts, C5a-C5aR interaction induced dysfunction of rat cardiomyocytes, resulting in compromised cardiac function [24]. Cleavage of the C5aR1 by neutrophil serine protease would be a further possible explanation for reduced C5aR protein concentration in cardiac tissue after trauma [43]. Accordingly, MPO measurement in left ventricular homogenates indicated increased neutrophil infiltration in cardiac tissue 24 h and 5 d after blunt chest trauma.

In the present study, mechanical damage and local inflammatory response after blunt chest trauma were associated with altered cardiomyocyte cell-to-cell integrity. Cx43 was found to be translocated from the intercalated disc region to the cytosol, which is in agreement with earlier studies, where alteration of Cx43 was found to be associated with both ischemic [44] and non-ischemic [45, 46] cardiac injury. Gap-junction endocytosis of Cx43 was associated with disruption of functional contact between cardiomyocytes and, as consequence, resulted in disruption of the coordinated spread of electrical activation, which was associated with the loss of mechanical and electrical coupling of cardiomyocytes [47, 48], arrhythmia and cardiac dysfunction [49, 50]. The translocation of Cx43 from the intercalated disc region to the cytosol resulting in loss of passage of small molecules and electrical current flow between cardiomyocytes might be an important mechanism of posttraumatic cardiac dysfunction. Further studies are needed to directly link gap junction pathology to cardiac dysfunction after trauma.

Furthermore, structural cardiac proteins located in the Z-lines, including desmin and  $\alpha$ -actinin, were down regulated after trauma. Z-disc proteins have been shown to act as responders to stretch and mechanical tension created by hemodynamic demands. Therefore, alterations may contribute to ventricular dysfunction after trauma [51].

Taken together, our results suggest that blast wave-induced blunt chest trauma in rats is associated with cardiac-cell damage, local inflammation, disturbed gap-junction architecture



and the presence of extracellular histones in the circulation. Further studies are needed to identify a direct relationship between the presence of extracellular histones occurring after blunt chest trauma and the appearance of defects in cardiac function and structure. It is possible that neutralizing these extracellular histones after trauma might represent an effective strategy for the treatment of patients with cardiac depression after trauma. The blunt chest trauma model, further characterized in the present work, appears to represent a useful small-animal model to prove such therapeutic strategies in vivo.

## Supporting information

### **S1 Fig. Expression of structural proteins and calcium pump in the heart after trauma.**

Altered expression of z-disc proteins and calcium pump SERCA after blunt chest trauma in the heart. A. Decrease in desmin expression 24 h and 5 d after blunt chest trauma compared to sham procedure. B. Decrease in  $\alpha$ 2-actinin expression 24 h after blunt chest trauma compared to sham procedure. C. Increased expression of sarcoplasmic/endoplasmic reticulum calcium ATPase (SERCA) 24 h after blunt chest trauma compared to sham procedure. For all frames n = 8 for each bar.

(TIFF)

## Acknowledgments

This work is supported by Deutsche Forschungsgemeinschaft grant CRC 1149.

## Author Contributions

**Conceptualization:** Miriam Kalbitz, Annette Palmer, Jochen Pressmar, Florian Gebhard, Hubert Schrezenmeier, Rolf Brenner, Markus Huber-Lang.

**Data curation:** Elisa Maria Amann, Belinda Bosch, Annette Palmer.

**Formal analysis:** Miriam Kalbitz, Belinda Bosch, Anke Schultze.

**Funding acquisition:** Miriam Kalbitz, Florian Gebhard, Hubert Schrezenmeier, Rolf Brenner, Markus Huber-Lang.

**Investigation:** Miriam Kalbitz, Birte Weber.

**Methodology:** Miriam Kalbitz, Belinda Bosch, Annette Palmer, Anke Schultze, Jochen Pressmar, Birte Weber, Martin Wepler, Rolf Brenner, Markus Huber-Lang.

**Project administration:** Miriam Kalbitz.

**Supervision:** Miriam Kalbitz, Florian Gebhard, Hubert Schrezenmeier.

**Validation:** Miriam Kalbitz, Martin Wepler.

**Visualization:** Miriam Kalbitz, Belinda Bosch, Anke Schultze, Jochen Pressmar.

**Writing – original draft:** Miriam Kalbitz.

**Writing – review & editing:** Miriam Kalbitz, Elisa Maria Amann, Jochen Pressmar, Martin Wepler, Florian Gebhard, Hubert Schrezenmeier, Rolf Brenner, Markus Huber-Lang.

## References

1. Elie MC. Blunt cardiac injury. *Mt Sinai J Med.* 2006; 73(2):542–52. PMID: [16568196](https://pubmed.ncbi.nlm.nih.gov/16568196/).
2. Huber S, Biberthaler P, Delhey P, Trentzsch H, Winter H, van Griensven M, et al. Predictors of poor outcomes after significant chest trauma in multiply injured patients: a retrospective analysis from the

- German Trauma Registry (Trauma Register DGU(R)). *Scand J Trauma Resusc Emerg Med.* 2014; 22(1):52. <https://doi.org/10.1186/s13049-014-0052-4> PMID: 25204466; PubMed Central PMCID: PMC4347585.
3. Huber S, Biberthaler P, Delhey P, Trentzsch H, Winter H, van Griensven M, et al. Predictors of poor outcomes after significant chest trauma in multiply injured patients: a retrospective analysis from the German Trauma Registry (Trauma Register DGU (R)). *Scand J Trauma Resusc.* 2014; 22. <https://doi.org/10.1186/S13049-014-0052-4> PMID: 25204466
  4. Skinner DL, Laing GL, Rodseth RN, Ryan L, Hardcastle TC, Muckart DJ. Blunt cardiac injury in critically ill trauma patients: a single centre experience. *Injury.* 2015; 46(1):66–70. <https://doi.org/10.1016/j.injury.2014.08.051> PMID: 25264354.
  5. Crown LA, Hawkins W. Commotio cordis: Clinical implications of blunt cardiac trauma. *American Family Physician.* 1997; 55(7):2467–70. PMID: 9166145
  6. Nirgiotis JG, Colon R, Sweeney MS. Blunt trauma to the heart: the pathophysiology of injury. *J Emerg Med.* 1990; 8(5):617–23. PMID: 2254611.
  7. Eisenach JC, Nugent M, Miller FA, Mucha P. Echocardiographic Evaluation of Patients with Blunt Chest Injury—Correlation with Perioperative Hypotension. *Anesthesiology.* 1986; 64(3):364–6. <https://doi.org/10.1097/00000542-198603000-00011> PMID: 3954132
  8. Irwin RJ, Lerner MR, Bealer JF, Brackett DJ, Tuggle DW. Cardiopulmonary physiology of primary blast injury. *J Trauma.* 1997; 43(4):650–5. PMID: 9356063.
  9. Guy RJ, Kirkman E, Watkins PE, Cooper GJ. Physiologic responses to primary blast. *J Trauma.* 1998; 45(6):983–7. PMID: 9867037.
  10. Knoferl MW, Liener UC, Seitz DH, Perl M, Bruckner UB, Kinzl L, et al. Cardiopulmonary, histological, and inflammatory alterations after lung contusion in a novel mouse model of blunt chest trauma. *Shock.* 2003; 19(6):519–25. doi: [10.1097/01.shk.0000070739.34700.f6](https://doi.org/10.1097/01.shk.0000070739.34700.f6) PMID: 12785006
  11. Cernak I, Savic J, Malicevic Z, Zunic G, Radosevic P, Ivanovic I, et al. Involvement of the central nervous system in the general response to pulmonary blast injury. *J Trauma.* 1996; 40(3 Suppl):S100–4. PMID: 8606388.
  12. Gandevia SC, McCloskey DI, Potter EK. Inhibition of baroreceptor and chemoreceptor reflexes on heart rate by afferents from the lungs. *J Physiol.* 1978; 276:369–81. PMID: 650460; PubMed Central PMCID: PMC1282431.
  13. Rocksen D, Gryth D, Druid H, Gustavsson J, Arborelius UP. Pathophysiological effects and changes in potassium, ionised calcium, glucose and haemoglobin early after severe blunt chest trauma. *Injury.* 2012; 43(5):632–7. <https://doi.org/10.1016/j.injury.2010.10.002> PMID: 21130436.
  14. Matzinger P. The danger model: A renewed sense of self. *Science.* 2002; 296(5566):301–5. <https://doi.org/10.1126/science.1071059> PMID: 11951032
  15. Manson J, Thiernemann C, Brohi K. Trauma alarmins as activators of damage-induced inflammation. *Brit J Surg.* 2012; 99:12–20. <https://doi.org/10.1002/bjs.7717> PMID: 22441851
  16. Abrams ST, Zhang N, Manson J, Liu T, Dart C, Baluwa F, et al. Circulating histones are mediators of trauma-associated lung injury. *Am J Resp Crit Care.* 2013; 187(2):160–9. Epub 2012/12/12. <https://doi.org/10.1164/rccm.201206-1037OC> PMID: 23220920; PubMed Central PMCID: PMC3570656.
  17. Boyd JH, Mathur S, Wang Y, Bateman RM, Walley KR. Toll-like receptor stimulation in cardiomyocytes decreases contractility and initiates an NF-kappaB dependent inflammatory response. *Cardiovasc Res.* 2006; 72(3):384–93. Epub 2006/10/24. <https://doi.org/10.1016/j.cardiores.2006.09.011> PMID: 17054926.
  18. Allam R, Scherbaum CR, Darisipudi MN, Mulay SR, Hagele H, Lichtnekert J, et al. Histones from dying renal cells aggravate kidney injury via TLR2 and TLR4. *J Am Soc Nephrol.* 2012; 23(8):1375–88. <https://doi.org/10.1681/ASN.2011111077> PMID: 22677551; PubMed Central PMCID: PMC3402284.
  19. Xu J, Zhang X, Monestier M, Esmon NL, Esmon CT. Extracellular histones are mediators of death through TLR2 and TLR4 in mouse fatal liver injury. *Journal of Immunology.* 2011; 187(5):2626–31. Epub 2011/07/26. <https://doi.org/10.4049/jimmunol.1003930> PMID: 21784973; PubMed Central PMCID: PMC3159755.
  20. Caudrillier A, Kessenbrock K, Gilliss BM, Nguyen JX, Marques MB, Monestier M, et al. Platelets induce neutrophil extracellular traps in transfusion-related acute lung injury. *J Clin Invest.* 2012; 122(7):2661–71. Epub 2012/06/12. <https://doi.org/10.1172/JCI61303> PMID: 22684106; PubMed Central PMCID: PMC3386815.
  21. Bosmann M, Grailer JJ, Ruemmler R, Russkamp NF, Zetoune FS, Sarma JV, et al. Extracellular histones are essential effectors of C5aR- and C5L2-mediated tissue damage and inflammation in acute lung injury. *Faseb J.* 2013. <https://doi.org/10.1096/fj.13-236380> PMID: 23982144.

22. Lausevic Z, Lausevic M, Trbojevic-Stankovic J, Krstic S, Stojimirovic B. Predicting multiple organ failure in patients with severe trauma. *Can J Surg*. 2008; 51(2):97–102. PMID: [18377749](#)
23. Burk AM, Martin M, Flierl MA, Rittirsch D, Helm M, Lampl L, et al. Early Complementopathy after Multiple Injuries in Humans. *Shock*. 2012; 37(4):348–54. <https://doi.org/10.1097/SHK.0b013e3182471795> PMID: [22258234](#)
24. Niederbichler AD, Hoesel LM, Westfall MV, Gao H, Ipaktchi KR, Sun L, et al. An essential role for complement C5a in the pathogenesis of septic cardiac dysfunction. *J Exp Med*. 2006; 203(1):53–61. Epub 2005/12/29. [jem.20051207 \[pii\] https://doi.org/10.1084/jem.20051207](https://doi.org/10.1084/jem.20051207) PMID: [16380509](#); PubMed Central PMCID: [PMC2118072](#).
25. SB MK, Woltersdorf S, Rodl CB, Vogt D, Hafner AK, Steinhilber D, et al. Development of novel aminothiazole-comprising 5-LO inhibitors. *Future Med Chem*. 2016; 8(2):149–64. <https://doi.org/10.4155/fmc.15.174> PMID: [26824797](#).
26. Knoferl MW, Liener UC, Perl M, Bruckner UB, Kinzl L, Gebhard F. Blunt chest trauma induces delayed splenic immunosuppression. *Shock*. 2004; 22(1):51–6. PMID: [15201702](#).
27. Schneider CA, Rasband WS, Eliceiri KW. NIH Image to ImageJ: 25 years of image analysis. *Nature methods*. 2012; 9(7):671–5. Epub 2012/08/30. PMID: [22930834](#).
28. Perl M, Chung CS, Perl U, Lomas-Neira J, de Paelpe M, Cioffi WG, et al. Fas-induced pulmonary apoptosis and inflammation during indirect acute lung injury. *Am J Resp Crit Care*. 2007; 176(6):591–601. <https://doi.org/10.1164/rccm.200611-1743OC> PMID: [17600273](#)
29. Kalbitz M, Grailer JJ, Fattahi F, Jajou L, Herron TJ, Campbell KF, et al. Role of extracellular histones in the cardiomyopathy of sepsis. *Faseb J*. 2015. <https://doi.org/10.1096/fj.14-268730> PMID: [25681459](#).
30. Bertinchant JP, Robert E, Polge A, de la Coussaye JE, Pignodel C, Aya G, et al. Release kinetics of cardiac troponin I and cardiac troponin T in effluents from isolated perfused rabbit hearts after graded experimental myocardial contusion. *J Trauma*. 1999; 47(3):474–80. PMID: [10498300](#).
31. Kutcher ME, Xu J, Vilardi RF, Ho C, Esmon CT, Cohen MJ. Extracellular histone release in response to traumatic injury: implications for a compensatory role of activated protein C. *J Trauma Acute Care Surg*. 2012; 73(6):1389–94. <https://doi.org/10.1097/TA.0b013e318270d595> PMID: [23188230](#); PubMed Central PMCID: [PMC3577065](#).
32. Alhamdi Y, Abrams ST, Cheng ZX, Jing SJ, Su DH, Liu ZY, et al. Circulating Histones Are Major Mediators of Cardiac Injury in Patients With Sepsis. *Critical Care Medicine*. 2015; 43(10):2094–103. <https://doi.org/10.1097/CCM.0000000000001162> PMID: [26121070](#)
33. Fattahi F, Grailer JJ, Jajou L, Zetoune FS, Andjelkovic AV, Ward PA. Organ distribution of histones after intravenous infusion of FITC histones or after sepsis. *Immunol Res*. 2015; 61(3):177–86. <https://doi.org/10.1007/s12026-015-8628-2> PMID: [25680340](#)
34. Zhang Y, Tocchetti CG, Krieg T, Moens AL. Oxidative and nitrosative stress in the maintenance of myocardial function. *Free Radic Biol Med*. 2012; 53(8):1531–40. Epub 2012/07/24. <https://doi.org/10.1016/j.freeradbiomed.2012.07.010> PMID: [22819981](#).
35. Santos CX, Anilkumar N, Zhang M, Brewer AC, Shah AM. Redox signaling in cardiac myocytes. *Free Radic Biol Med*. 2011; 50(7):777–93. Epub 2011/01/18. <https://doi.org/10.1016/j.freeradbiomed.2011.01.003> PMID: [21236334](#); PubMed Central PMCID: [PMC3049876](#).
36. Rudiger A, Singer M. The heart in sepsis: from basic mechanisms to clinical management. *Curr Vasc Pharmacol*. 2013; 11(2):187–95. PMID: [23506497](#).
37. Kalbitz M, Fattahi F, Grailer JJ, Jajou L, Malan EA, Zetoune FS, et al. Complement-induced activation of the cardiac NLRP3 inflammasome in sepsis. *Faseb J*. 2016. <https://doi.org/10.1096/fj.201600728R> PMID: [27543123](#).
38. Atefi G, Zetoune FS, Herron TJ, Jalife J, Bosmann M, Al-Aref R, et al. Complement dependency of cardiomyocyte release of mediators during sepsis. *Faseb J*. 2011; 25(7):2500–8. Epub 2011/04/12. <https://doi.org/10.1096/fj.11-183236> PMID: [21478262](#); PubMed Central PMCID: [PMC3114524](#).
39. Hoesel LM, Niederbichler AD, Schaefer J, Ipaktchi KR, Gao H, Rittirsch D, et al. C5a-blockade improves burn-induced cardiac dysfunction. *Journal of Immunology*. 2007; 178(12):7902–10. Epub 2007/06/06. PMID: [17548628](#).
40. Poursharifi P, Lapointe M, Petrin D, Devost D, Gauvreau D, Hebert TE, et al. C5L2 and C5aR interaction in adipocytes and macrophages: Insights into adipoinmunology. *Cell Signal*. 2013; 25(4):910–8. <https://doi.org/10.1016/j.cellsig.2012.12.010> PMID: [23268185](#)
41. Seely AJE, Naud JF, Campisi G, Giannias B, Liu SQ, DiCarlo A, et al. Alteration of chemoattractant receptor expression regulates human neutrophil chemotaxis in vivo. *Ann Surg*. 2002; 235(4):550–9. <https://doi.org/10.1097/0000658-200204000-00014> PMID: [11923612](#)

42. Guo RF, Riedemann NC, Bernacki KD, Sarma VJ, Laudes IJ, Reuben JS, et al. Neutrophil C5a receptor and the outcome in a rat model of sepsis. *Faseb J*. 2003; 17(13):1889–91. Epub 2003/08/05. <https://doi.org/10.1096/fj.03-0009fje> PMID: 12897064.
43. van den Berg CW, Tambourgi DV, Clark HW, Hoong SJ, Spiller OB, McGreal EP. Mechanism of Neutrophil Dysfunction: Neutrophil Serine Proteases Cleave and Inactivate the C5a Receptor. *Journal of Immunology*. 2014; 192(4):1787–95. <https://doi.org/10.4049/jimmunol.1301920> PMID: 24446515
44. Jain SK, Schuessler RB, Saffitz JE. Mechanisms of delayed electrical uncoupling induced by ischemic preconditioning. *Circ Res*. 2003; 92(10):1138–44. <https://doi.org/10.1161/01.RES.0000074883.66422.C5> PMID: 12730093.
45. Glukhov AV, Fedorov VV, Kalish PW, Ravikumar VK, Lou Q, Janks D, et al. Conduction remodeling in human end-stage nonischemic left ventricular cardiomyopathy. *Circulation*. 2012; 125(15):1835–47. <https://doi.org/10.1161/CIRCULATIONAHA.111.047274> PMID: 22412072; PubMed Central PMCID: PMC3351089.
46. Vetter C, Zweifel M, Zuppinger C, Carrel T, Martin D, Haefliger JA, et al. Connexin 43 Expression in Human Hypertrophied Heart Due to Pressure and Volume Overload. *Physiol Res*. 2010; 59(1):35–42. PMID: 19249908
47. Agullo-Pascual E, Cerrone M, Delmar M. Arrhythmogenic cardiomyopathy and Brugada syndrome: Diseases of the connexome. *Febs Lett*. 2014; 588(8):1322–30. <https://doi.org/10.1016/j.febslet.2014.02.008> PMID: 24548564
48. Asimaki A, Kapoor S, Plovie E, Arndt AK, Adams E, Liu ZZ, et al. Identification of a New Modulator of the Intercalated Disc in a Zebrafish Model of Arrhythmogenic Cardiomyopathy. *Sci Transl Med*. 2014; 6(240). <https://doi.org/10.1126/scitranslmed.3008008> PMID: 24920660
49. Gutstein DE, Morley GE, Tamaddon H, Vaidya D, Schneider MD, Chen J, et al. Conduction slowing and sudden arrhythmic death in mice with cardiac-restricted inactivation of connexin43. *Circulation Research*. 2001; 88(3):333–9. PMID: 11179202
50. Xia Y, Gong KZ, Xu M, Zhang YY, Guo JH, Song Y, et al. Regulation of gap-junction protein connexin 43 by beta-adrenergic receptor stimulation in rat cardiomyocytes. *Acta Pharmacol Sin*. 2009; 30(7):928–34. <https://doi.org/10.1038/aps.2009.92> PMID: 19574999
51. Pyle WG, Solaro RJ. At the crossroads of myocardial signaling—The role of Z-discs in intracellular signaling and cardiac function. *Circulation Research*. 2004; 94(3):296–305. <https://doi.org/10.1161/01.RES.0000116143.74830.A9> PMID: 14976140
